# Supplementary material for: Stromal expression of ALDH1 in human breast carcinomas indicates reduced tumor progression
Source: PubMed Central journal article supplement (PMC4694953; doi:10.18632/oncotarget.4628), 2015-07-20
Supplement: oncotarget-06-26789-s001.pdf [file oncotarget-06-26789-s001.pdf]

## SUPPLEMENTARY INFORMATION

### IMMUNOHISTOCHEMICAL DETECTION OF ALDH1/HLA-DR DOUBLE STAINING

Deparaffinized TMA sections were treated for 5 min. in citrate buffer (pH 6.0, Biogenex, USA) at 120°C in steamer and incubated overnight at 4°C with rabbit monoclonal anti-HLA-DR antibody (EPR3692, Abcam) and mouse monoclonal anti-ALDH1 antibody (44/ALDH1, BD Biosciences, US) diluted 1:800 and

1:500, respectively, in Dako REALTM Antibody Diluent (Dako, Denmark). Primary antibodies were detected and envisioned with the usage of secondary anti-mouse antibody labelled with horseradish peroxidase diluted 1:100 followed by 10 min. incubation with DAB substrate diluted 1:50 (Dako, Denmark) and anti-rabbit antibody labelled with alkaline phosphatase diluted 1:40 followed by 20 min. incubation with new fuchsine. The specimens were counterstained with hematoxylin (Merck, Germany).

SUPPLEMENTARY FIGURE AND TABLES

Tumoral ALDH1,  
stage I-III patients

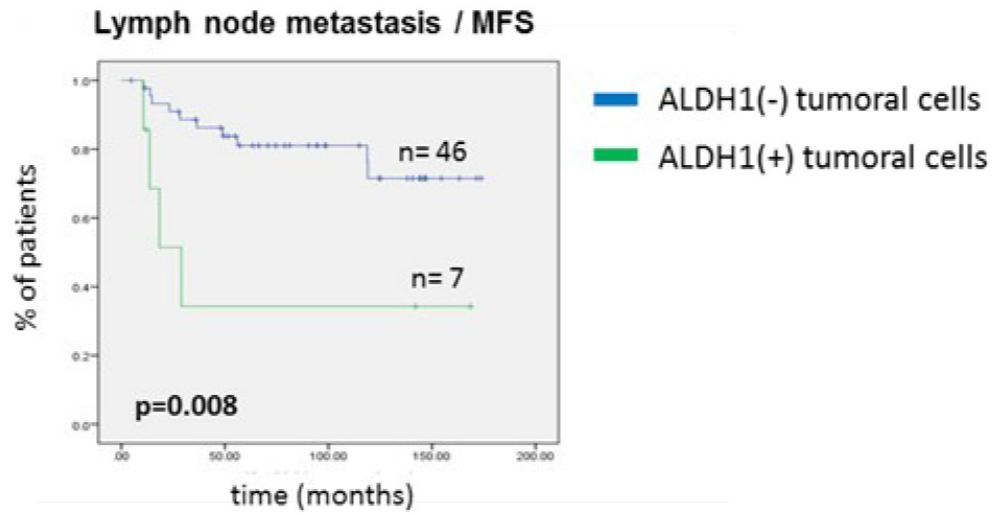

Supplementary Figure S1: Impact of ALDH1 expression in tumor cells of lymph node metastasis on survival of stage I-III breast cancer patients.

Supplementary Table S1. Comparison of stromal and tumoral ALDH1 expression to clinico-pathological data

| Clinical, pathological and molecular parameters |                 | ALDH1 stromal |      |          |      | ALDH1 tumoral |      |          |       |
|-------------------------------------------------|-----------------|---------------|------|----------|------|---------------|------|----------|-------|
|                                                 |                 | Neg           |      | Pos      |      | Neg           |      | Pos      |       |
|                                                 |                 | <i>n</i>      | %    | <i>n</i> | %    | <i>n</i>      | %    | <i>n</i> | %     |
| Age (years)                                     | <median         | 79            | 47.3 | 96       | 54.9 | 143           | 51.3 | 32       | 50.8  |
|                                                 | >= median       | 88            | 52.7 | 79       | 45.1 | 136           | 48.7 | 31       | 49.2  |
|                                                 | <i>p</i> -value | 0.163         |      |          |      | 0.947         |      |          |       |
| T status                                        | T1              | 73            | 43.7 | 84       | 48.3 | 133           | 47.7 | 24       | 38.7  |
|                                                 | T2              | 76            | 45.5 | 75       | 43.1 | 119           | 42.7 | 32       | 51.6  |
|                                                 | T3              | 8             | 4.8  | 9        | 5.2  | 14            | 5.0  | 3        | 4.8   |
|                                                 | T4              | 10            | 6.0  | 6        | 3.4  | 13            | 4.7  | 3        | 4.8   |
|                                                 | <i>p</i> -value | 0.638         |      |          |      | 0.613         |      |          |       |
| N status                                        | N0              | 96            | 57.8 | 100      | 58.1 | 166           | 60.4 | 30       | 47.6  |
|                                                 | N1-3            | 70            | 42.2 | 72       | 41.9 | 109           | 39.6 | 33       | 52.4  |
|                                                 | <i>p</i> -value | 0.954         |      |          |      | 0.065         |      |          |       |
| M status                                        | M0              | 198           | 97.5 | 218      | 99.5 | 340           | 98.3 | 76       | 100.0 |
|                                                 | M1              | 5             | 2.5  | 1        | 0.5  | 6             | 1.7  | 0        | 0.0   |
|                                                 | <i>p</i> -value | 0.110 (F)     |      |          |      | 0.597 (F)     |      |          |       |
| TNM staging                                     | IA              | 52            | 31.7 | 65       | 38.0 | 98            | 35.9 | 19       | 30.6  |
|                                                 | IIA             | 53            | 32.3 | 49       | 28.7 | 87            | 31.9 | 15       | 24.2  |
|                                                 | IIB             | 27            | 16.5 | 31       | 18.1 | 43            | 15.8 | 15       | 24.2  |
|                                                 | IIIA            | 14            | 8.5  | 16       | 9.4  | 23            | 8.4  | 7        | 11.3  |
|                                                 | IIIB            | 10            | 6.1  | 5        | 2.9  | 12            | 4.4  | 3        | 4.8   |
|                                                 | IIIC            | 3             | 1.8  | 4        | 2.3  | 4             | 1.5  | 3        | 4.8   |
|                                                 | IV              | 5             | 3.0  | 1        | 0.6  | 6             | 2.2  | 0        | 0.0   |
|                                                 | <i>p</i> -value | 0.386         |      |          |      | 0.234         |      |          |       |
| Grade                                           | G1              | 17            | 10.3 | 30       | 17.5 | 36            | 13.2 | 11       | 17.5  |
|                                                 | G2              | 92            | 55.8 | 82       | 48.0 | 143           | 52.4 | 31       | 49.2  |
|                                                 | G3              | 56            | 33.9 | 59       | 34.5 | 94            | 34.4 | 21       | 33.3  |
|                                                 | <i>p</i> -value | 0.126         |      |          |      | 0.675         |      |          |       |
| Vascular invasion                               | no              | 86            | 71.7 | 92       | 78.0 | 167           | 81.1 | 11       | 34.4  |
|                                                 | yes             | 34            | 28.3 | 26       | 22.0 | 39            | 18.9 | 21       | 65.6  |
|                                                 | <i>p</i> -value | 0.263         |      |          |      | <0.001        |      |          |       |
| Recurrence                                      | no              | 113           | 71.5 | 140      | 80.9 | 203           | 75.5 | 50       | 80.6  |

(Continued)

| Clinical, pathological<br>and molecular<br>parameters |                 | ALDH1 stromal |      |          |      | ALDH1 tumoral |      |          |      |
|-------------------------------------------------------|-----------------|---------------|------|----------|------|---------------|------|----------|------|
|                                                       |                 | Neg           |      | Pos      |      | Neg           |      | Pos      |      |
|                                                       |                 | <i>n</i>      | %    | <i>n</i> | %    | <i>n</i>      | %    | <i>n</i> | %    |
|                                                       | yes             | 45            | 28.5 | 33       | 19.1 | 66            | 24.5 | 12       | 19.4 |
|                                                       | <i>p</i> -value | <b>0.044</b>  |      |          |      | 0.386         |      |          |      |
| <b>Death</b>                                          | no              | 132           | 81.0 | 156      | 89.1 | 231           | 84.0 | 57       | 90.5 |
|                                                       | yes             | 31            | 19.0 | 19       | 10.9 | 44            | 16.0 | 6        | 9.5  |
|                                                       | <i>p</i> -value | <b>0.035</b>  |      |          |      | 0.239 (F)     |      |          |      |
| <b>Her2</b>                                           | neg             | 141           | 92.8 | 150      | 95.5 | 241           | 94.9 | 50       | 90.9 |
|                                                       | pos             | 11            | 7.2  | 7        | 4.5  | 13            | 5.1  | 9        | 9.1  |
|                                                       | <i>p</i> -value | 0.297         |      |          |      | 0.254         |      |          |      |
| <b>HR</b>                                             | neg             | 38            | 22.9 | 35       | 20.2 | 59            | 21.2 | 14       | 23.0 |
|                                                       | pos             | 128           | 77.1 | 138      | 79.8 | 219           | 78.8 | 47       | 77.0 |
|                                                       | <i>p</i> -value | 0.551         |      |          |      | 0.766         |      |          |      |
| <b>Molecular<br/>subtype</b>                          | Luminal A       | 42            | 31.6 | 44       | 31.2 | 77            | 33.8 | 9        | 19.6 |
|                                                       | Luminal B       | 56            | 42.1 | 63       | 44.7 | 96            | 42.1 | 23       | 50.0 |
|                                                       | Her2-pos        | 3             | 2.3  | 2        | 1.4  | 2             | 0.9  | 3        | 6.5  |
|                                                       | Basal-like      | 32            | 24.1 | 32       | 22.7 | 53            | 23.2 | 11       | 23.9 |
|                                                       | <i>p</i> -value | 0.935         |      |          |      | <b>0.021</b>  |      |          |      |

F indicates Fisher exact test, otherwise Chi square test.

**Supplementary Table S2. Clinico-pathological characteristics of breast cancer patients included in the study**

| Clinical, pathological and molecular parameters | Status                         | <i>n</i> | %    |
|-------------------------------------------------|--------------------------------|----------|------|
| <b>Age (years)</b>                              | median=58                      | 58       |      |
|                                                 | range                          | 27-86    |      |
|                                                 | <median                        | 284      | 49.6 |
|                                                 | >=median                       | 289      | 50.4 |
|                                                 | total                          | 573      |      |
| <b>T status</b>                                 | T1                             | 276      | 48.3 |
|                                                 | T2                             | 241      | 42.2 |
|                                                 | T3                             | 30       | 5.3  |
|                                                 | T4                             | 24       | 4.2  |
|                                                 | total                          | 571      |      |
| <b>N status</b>                                 | N0                             | 332      | 58.3 |
|                                                 | N1-3                           | 237      | 41.7 |
|                                                 | total                          | 569      |      |
| <b>M status</b>                                 | M0                             | 566      | 97.6 |
|                                                 | M1                             | 14       | 2.4  |
|                                                 | total                          | 580      |      |
| <b>TNM staging</b>                              | IA                             | 200      | 35.8 |
|                                                 | IIA                            | 171      | 30.6 |
|                                                 | IIB                            | 92       | 16.5 |
|                                                 | IIIA                           | 47       | 8.4  |
|                                                 | IIIB                           | 21       | 3.8  |
|                                                 | IIIC                           | 13       | 2.3  |
|                                                 | IV                             | 14       | 2.5  |
|                                                 | total                          | 558      |      |
| <b>Grade</b>                                    | well differentiated (G1)       | 78       | 13.9 |
|                                                 | moderately differentiated (G2) | 298      | 52.9 |
|                                                 | poorly differentiated (G3)     | 187      | 33.2 |
|                                                 | total                          | 563      |      |
| <b>Vascular invasion</b>                        | No                             | 360      | 82.6 |
|                                                 | Yes                            | 76       | 17.4 |
|                                                 | total                          | 436      |      |
| <b>Recurrence</b>                               | No                             | 466      | 82.5 |
|                                                 | Yes                            | 99       | 17.5 |
|                                                 | total                          | 565      |      |

(Continued)

| Clinical, pathological and molecular parameters | Status        | <i>n</i> | %    |
|-------------------------------------------------|---------------|----------|------|
| <b>Death</b>                                    | No            | 496      | 88   |
|                                                 | Yes           | 68       | 12   |
|                                                 | total         | 564      |      |
| <b>Her2</b>                                     | negative      | 483      | 94.3 |
|                                                 | positive      | 29       | 5.7  |
|                                                 | total         | 512      |      |
| <b>HR</b>                                       | negative      | 117      | 20.5 |
|                                                 | positive      | 454      | 79.5 |
|                                                 | total         | 571      |      |
| <b>Molecular subtype</b>                        | Luminal A     | 158      | 34.6 |
|                                                 | Luminal B     | 194      | 42.5 |
|                                                 | Her2-positive | 6        | 1.3  |
|                                                 | Basal-like    | 98       | 21.5 |
|                                                 | total         | 456      |      |

Note that due to the missing values not all numbers sum up to 589 cases.

HR indicates hormone receptor

**Supplementary Table S3. Clinico-pathological and treatment characteristics of breast cancer patients included in Hamburg Cohort**

|                           | total        | <i>n</i> | %    |
|---------------------------|--------------|----------|------|
| <b>DTC status</b>         | <b>neg</b>   | 297      | 74.3 |
| <b>in bone marrow</b>     | <b>pos</b>   | 103      | 25.8 |
|                           | <b>total</b> | 400      |      |
| <b>Metastatic relapse</b> | <b>no</b>    | 320      | 85.6 |
|                           | <b>yes</b>   | 54       | 14.4 |
|                           | <b>total</b> | 374      |      |
| <b>Chemotherapy</b>       | <b>no</b>    | 150      | 37.8 |
|                           | <b>yes</b>   | 247      | 62.2 |
|                           | <b>total</b> | 397      |      |
| <b>Radiotherapy</b>       | <b>no</b>    | 81       | 20.3 |
|                           | <b>yes</b>   | 319      | 79.8 |
|                           | <b>total</b> | 400      |      |
| <b>Endocrine therapy</b>  | <b>no</b>    | 99       | 24.9 |
|                           | <b>yes</b>   | 298      | 75.1 |
|                           | <b>total</b> | 397      |      |

Note that due to the missing values not all numbers sum up to 411 cases.

**Supplementary Table S4. Molecular and clinico-pathological characteristics of breast cancer patients included in Polish Cohort**

|                   | <b>total</b>          | <b><i>n</i></b> | <b>%</b> |
|-------------------|-----------------------|-----------------|----------|
| <b>Ki-67</b>      | <b>neg</b>            | 96              | 58.9     |
|                   | <b>pos</b>            | 67              | 41.1     |
|                   | <b>total</b>          | 163             |          |
|                   | <b>missing</b>        |                 |          |
| <b>CK5/6</b>      | <b>neg</b>            | 139             | 91.4     |
|                   | <b>pos</b>            | 13              | 8.6      |
|                   | <b>total</b>          | 152             |          |
|                   | <b>missing</b>        |                 |          |
| <b>E-cadherin</b> | <b>neg</b>            | 45              | 30.8     |
|                   | <b>pos</b>            | 101             | 69.2     |
|                   | <b>total</b>          | 146             |          |
|                   | <b>missing</b>        |                 |          |
| <b>Vimentin</b>   | <b>neg</b>            | 143             | 89.4     |
|                   | <b>pos</b>            | 17              | 10.6     |
|                   | <b>total</b>          | 160             |          |
|                   | <b>missing</b>        |                 |          |
| <b>EMT</b>        | <b>E-cad(+)Vim(-)</b> | 90              | 62.5     |
|                   | <b>E-cad(-)Vim(-)</b> | 38              | 26.4     |
|                   | <b>E-cad(+)Vim(+)</b> | 10              | 6.9      |
|                   | <b>E-cad(-)Vim(+)</b> | 6               | 4.2      |
|                   | <b>total</b>          | 144             |          |
|                   | <b>missing</b>        |                 |          |

Note that due to the missing values not all numbers sum up to 178 cases.

EMT indicates epithelial-mesenchymal transition, E-cad – E-cadherin, vim - vimentin



**Supplementary Table S5. Different cut-offs tested in the current study**

| <b>Cut-off for ALDH1 in tumor cells based on</b>          | <b>neg vs. pos</b>                                                                                                                      |
|-----------------------------------------------------------|-----------------------------------------------------------------------------------------------------------------------------------------|
| intensity                                                 | no vs. weak vs. moderate vs. strong                                                                                                     |
| intensity                                                 | no, weak vs. moderate, strong                                                                                                           |
| intensity                                                 | no, weak, moderate vs. strong                                                                                                           |
| intensity                                                 | no vs. weak, moderate, strong                                                                                                           |
| % of positive cells                                       | ≥1%                                                                                                                                     |
| % of positive cells                                       | ≥5%                                                                                                                                     |
| <b>index score (maximal result for two tumor samples)</b> | <b>&lt;mean index score vs. &gt; mean index score</b>                                                                                   |
| index score (maximal result for two tumor samples)        | <median index score vs. > median index score                                                                                            |
| index score (sum for two tumor samples)                   | <mean index score vs. > mean index score                                                                                                |
| index score (sum for two tumor samples)                   | <median index score vs. > median index score                                                                                            |
| <b>Cut-off for ALDH1 in stromal cells based on</b>        | <b>neg vs. pos</b>                                                                                                                      |
| index score                                               | no expression vs. expression in <10% of stromal cells vs. expression in 10-50% of stromal cells vs. expression in >50% of stromal cells |
| index score                                               | no expression vs. expression in >1% of stromal cells                                                                                    |
| <b>index score</b>                                        | <b>expression in &lt;10% of stromal cells vs. expression in &gt;10% of stromal cells</b>                                                |
| index score                                               | expression in <50% of stromal cells vs. expression in >50% of stromal cells                                                             |
